# Supplementary material
Source: PubMed Central journal article supplement (PMC5920244)
Supplement: EMBJ-37-e97368-s002.pdf [file EMBJ-37-e97368-s002.pdf]

## Expanded View Figures

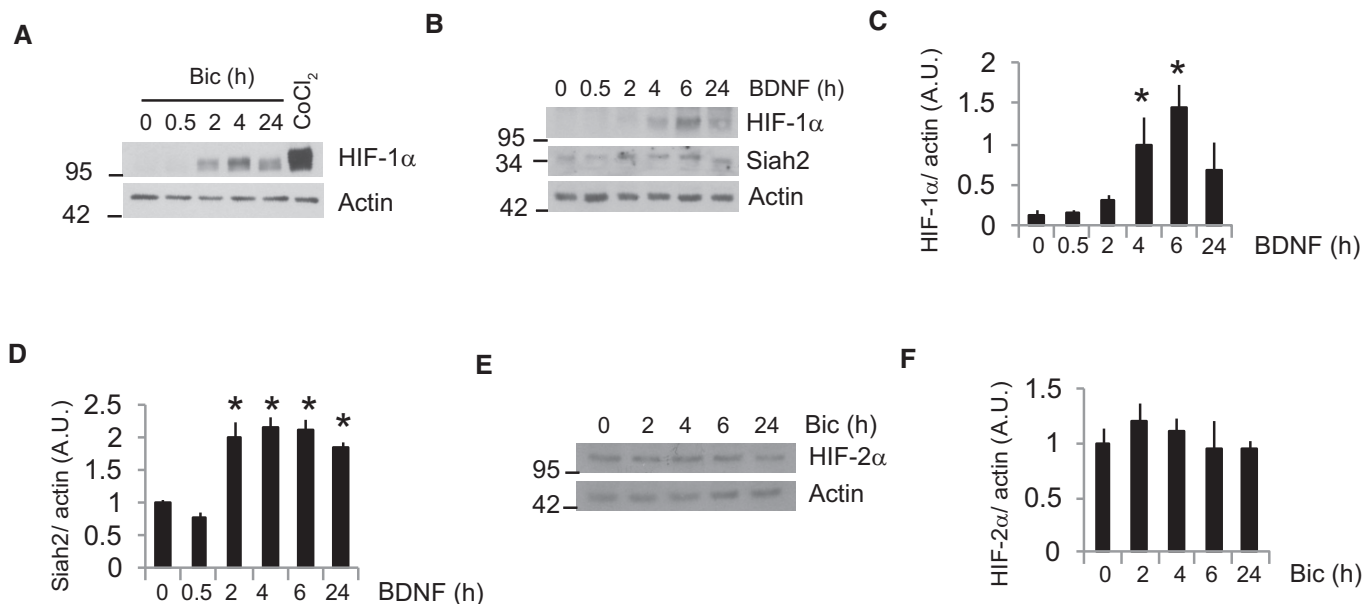

**Figure EV1. Synaptic activity and BDNF stabilize HIF-1α.**

A–D Representative Western blots of cortical neurons stimulated with (A) Bic+4-AP at the indicated time points or the hypoxia-mimetic CoCl<sub>2</sub> (200 μM) for 4 h and (B) BDNF (25 ng/ml) for the indicated time points (*n* = 4–5 independent experiments) and (C and D) densitometric analysis. Values represent mean ± s.e.m. \**P* < 0.05, two-tailed Student's *t*-test.

E Neurons were stimulated with Bic+4-AP for the indicated times and HIF-2α was analyzed by Western blot.

F Densitometric analysis (*n* = 4 independent experiments). Values represent mean ± s.e.m.

Source data are available online for this figure.

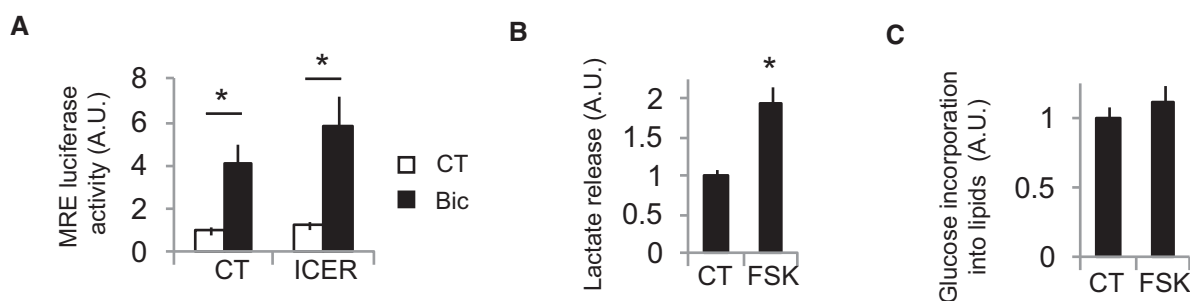

**Figure EV2. Glut3 and Siah2 expression is regulated by CREB.**

A Luciferase-based MEF2 activity in neurons expressing a control plasmid (globin) or the CREB inhibitor ICER and stimulated with Bic+4-AP for 8 h (*n* = 7 independent experiments). Values represent mean ± s.e.m. \**P* < 0.05, one-way ANOVA followed by Tukey's *post hoc* test.

B Lactate released into the medium by neurons stimulated with 10 μM forskolin (for 24 h; *n* = 4 independent experiments). Values represent mean ± s.e.m. \**P* < 0.05, two-tailed Student's *t*-test.

C <sup>14</sup>C-U-glucose incorporation into lipids in neurons treated with 10 μM forskolin for 48 h (*n* = 4 independent experiments). Values represent mean ± s.e.m.

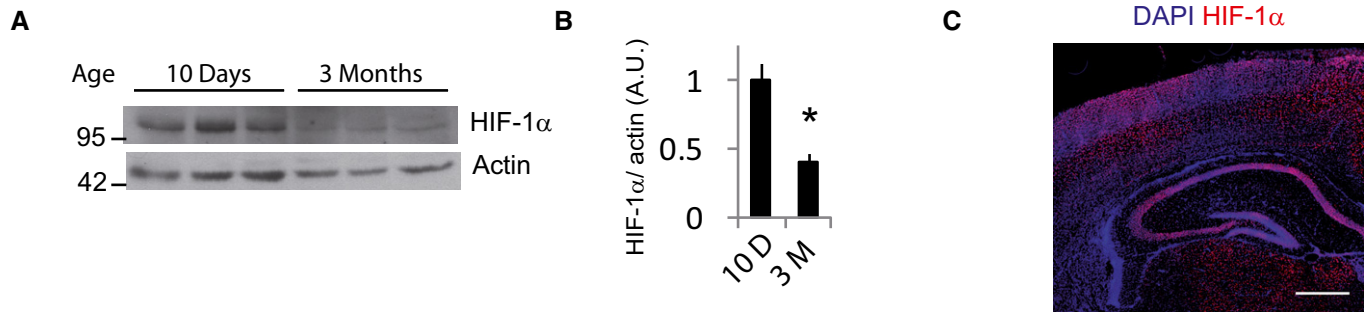

**Figure EV3. HIF-1 $\alpha$  is highly expressed in the brain of 10-day-old mice.**

A, B (A) Representative Western blot of HIF-1 $\alpha$  expression in protein extracts of the cortex of 10-day and 3-month-old mice and (B) densitometric analysis ( $n = 4$  mice per condition). Values represent mean  $\pm$  s.e.m. \* $P < 0.05$ , two-tailed Student's  $t$ -test.

C Immunofluorescence detection of HIF-1 $\alpha$  in coronal sections from 10-day-old mice ( $n = 3$  mice). Scale bar, 100  $\mu$ m.

Source data are available online for this figure.
