# Supplementary material
Source: PubMed Central journal article supplement (PMC5920244)

Figure 2E

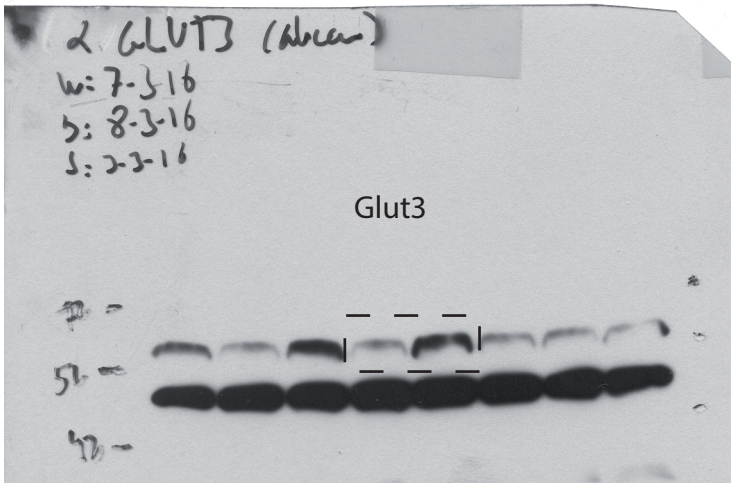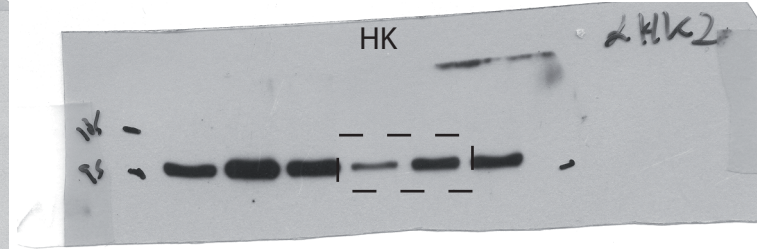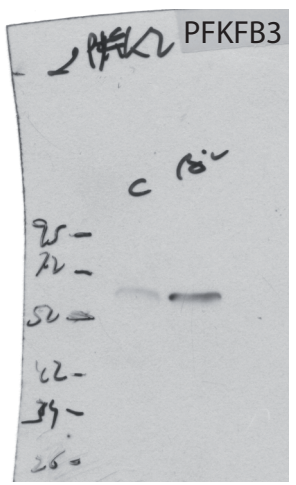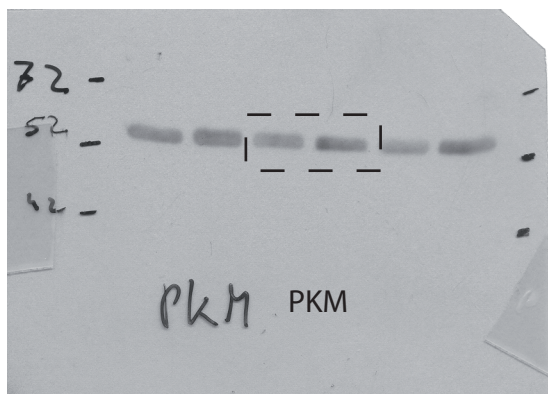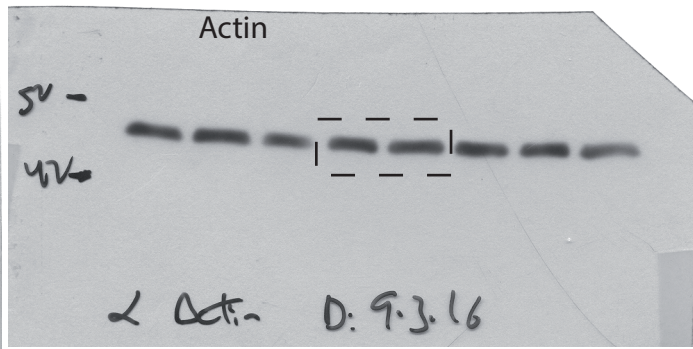

Supplement: EMBJ-37-e97368-s003.pdf [file EMBJ-37-e97368-s003.pdf]

Figure 3A

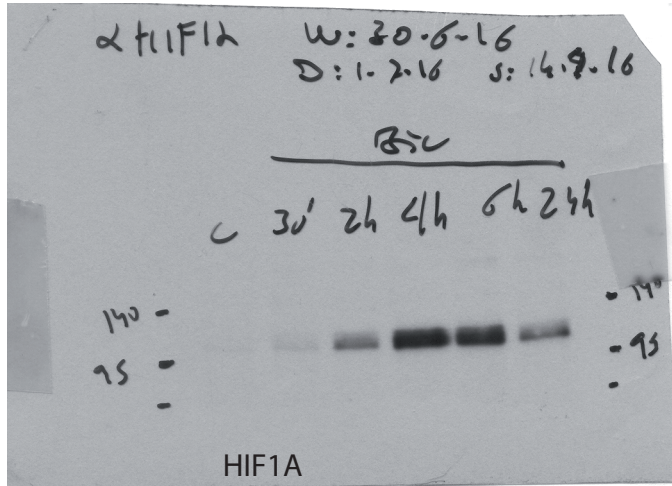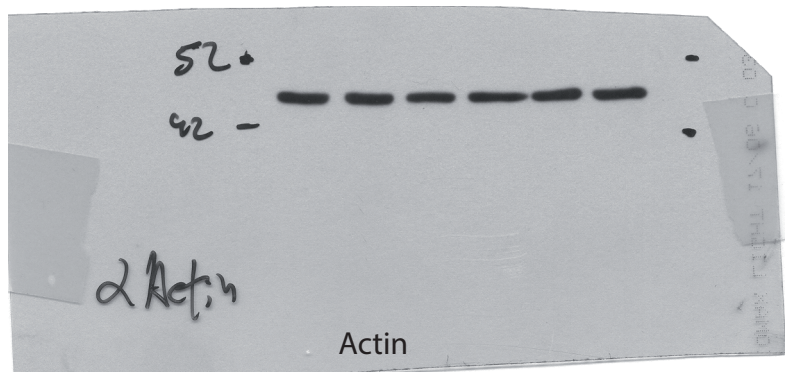

Supplement: EMBJ-37-e97368-s004.pdf [file EMBJ-37-e97368-s004.pdf]

Figure 4D

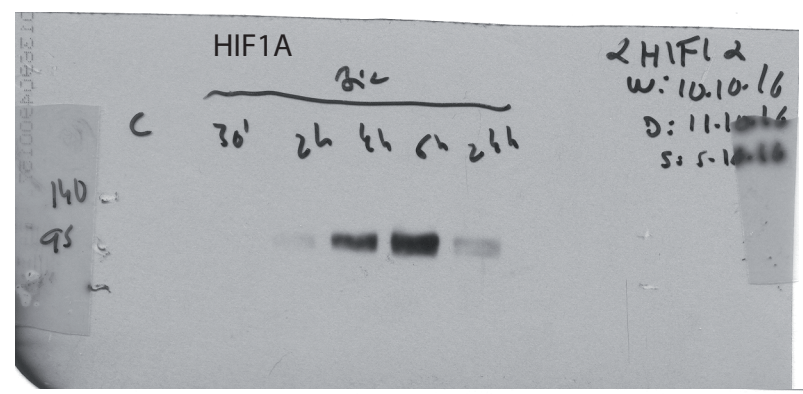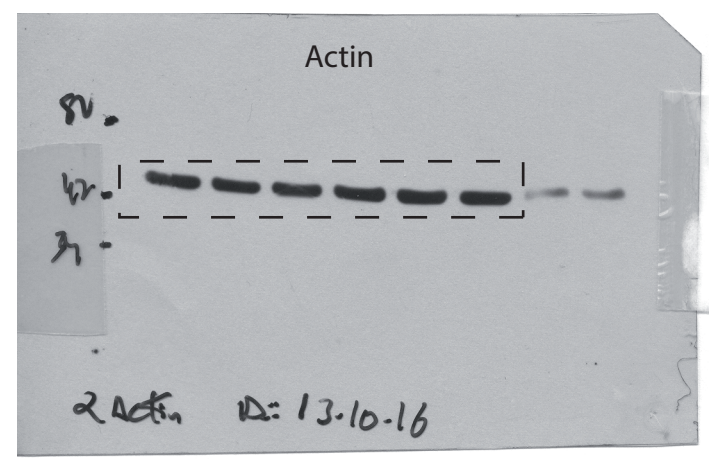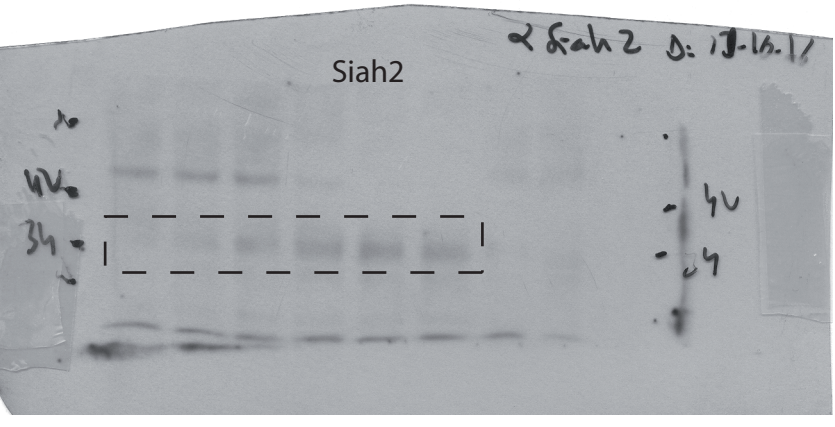

Figure 4F

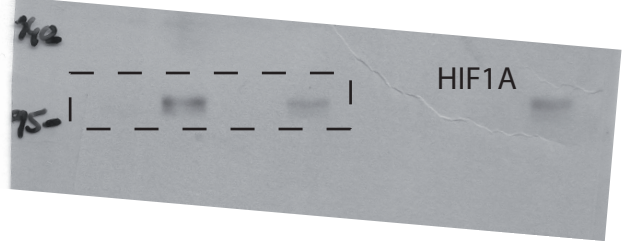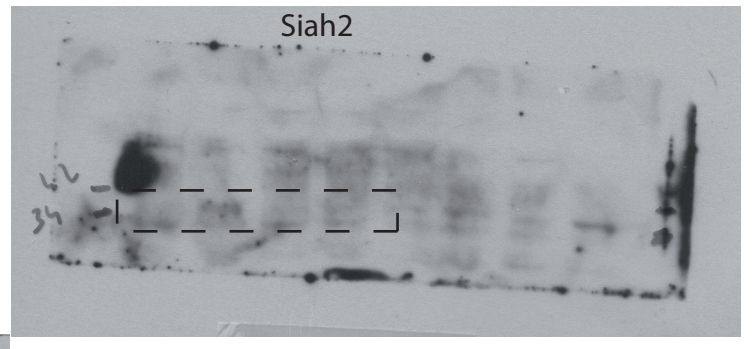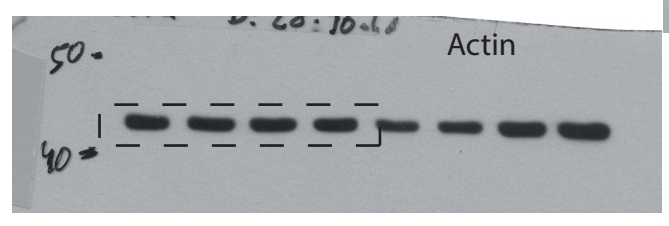

Figure 4K

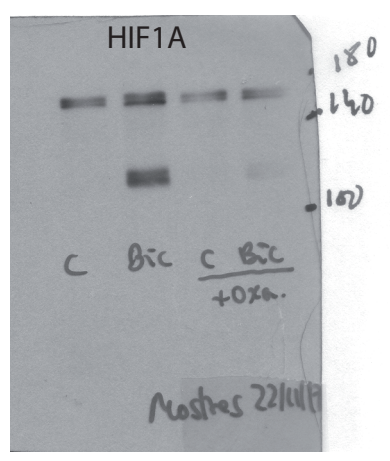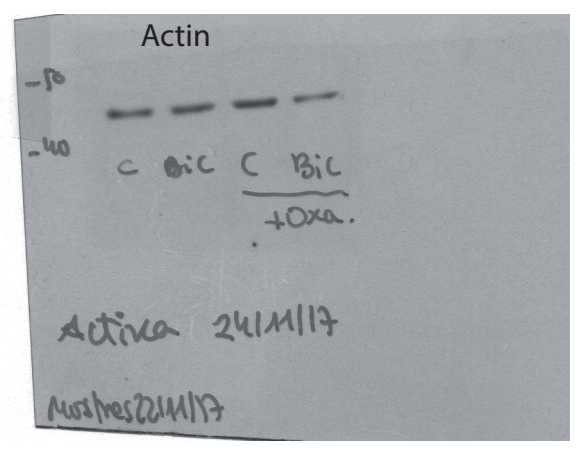

Supplement: EMBJ-37-e97368-s005.pdf [file EMBJ-37-e97368-s005.pdf]

Figure 5C

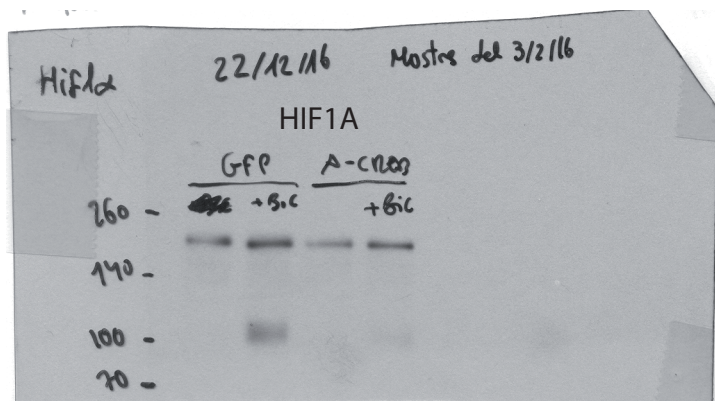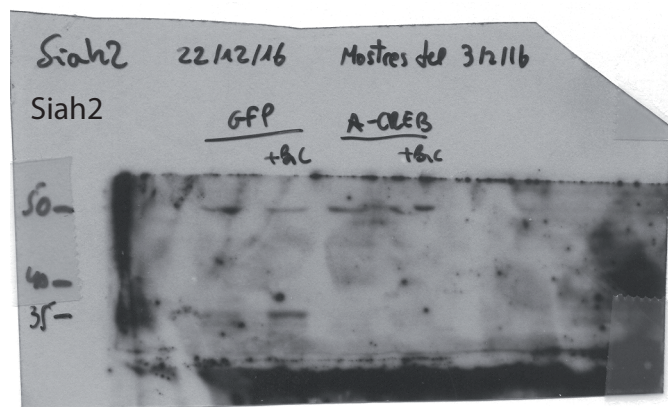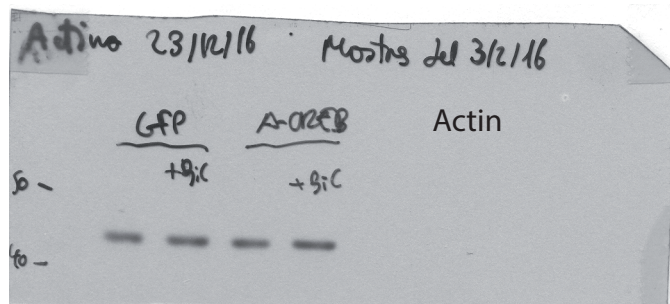

Figure 5G

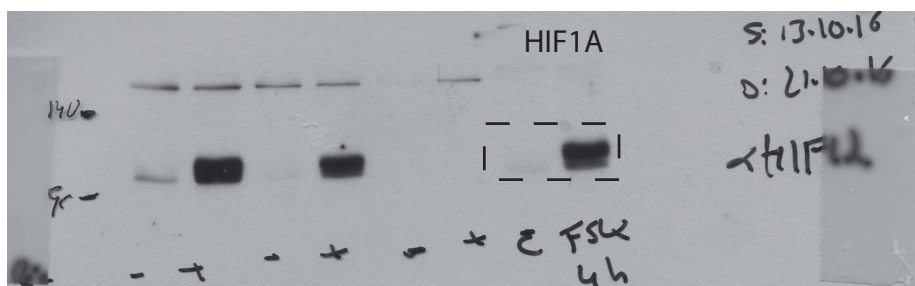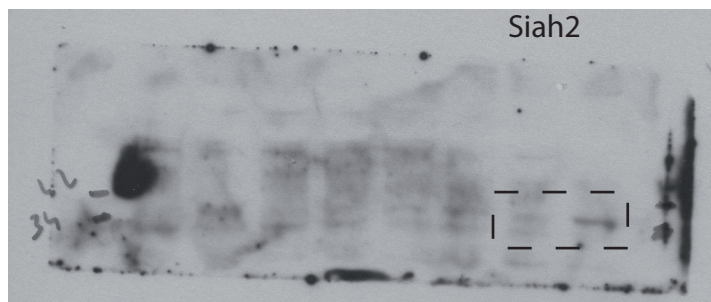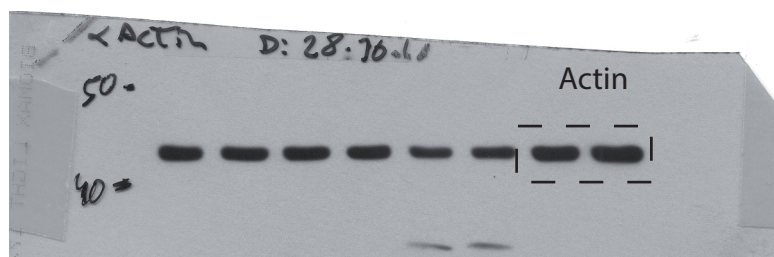

Supplement: EMBJ-37-e97368-s006.pdf [file EMBJ-37-e97368-s006.pdf]
